# Supplementary material
Source: ML conference proceedings conference paper supplement (https://openaccess.thecvf.com/content/CVPRW_2020/html/Atoum_Color-Wise_Attention_Network_CVPRW_2020_paper.html)
Supplement: Supplementary file 1 [file 12-supp.pdf › 12-supp/12-supp.pdf]

# Supplementary Material

## Color-wise Attention Network for Low-light Image Enhancement

Yousef Atoum  
Yarmouk University

Mao Ye  
BOSCH Research North America

Liu Ren  
BOSCH Research North America

Ying Tai  
Tencent YouTu

Xiaoming Liu  
Michigan State University

### 1. Contents of the supplementary material

In this document, we provide additional materials to supplement our main paper submission. We mainly focus on qualitative results of our proposed method in the provided materials, since the main submission has sufficient quantitative experiments. Note that all images used in this supplementary document are down-sampled by a factor of 0.25 to satisfy the size limitation when submitted.

The contents of this document is as follows:

- In Sec. 2, we evaluate CWAN on both synthetic and real low-light videos. The results of the low-light video enhancement are provided in separate supplementary video files.
- In Sec. 3, we provide visual examples of the proposed  $CWAN_L$  model. We show the enhanced lightness  $\mathbf{X}_L$  of the five test images used in the LLNet paper [10].
- In Sec. 4, we provide additional qualitative results on  $SID_{Sony}$ ,  $SID_{Fuji}$  and  $PASCAL_{1000}$ .
- In Sec. 5, we provide additional qualitative results on HDRDB.
- In Sec. 6, we have a discussion regarding generating very colorful images, sometimes even better than the ground truth images.

## 2. Evaluating CWAN on low-light videos

The ability to enhance low-light images is the main objective of our submission, where CWAN is proven to achieve state-of-the-art results compared to many baselines. We further conduct two additional experiments on low-light video enhancement, comparing our proposed CWAN method with the top three baselines which achieved the best results based on our main paper submission experiments, namely LIME [6], LightenNet [8], and SID [1].

In the first experiment, we use a small subset of seven videos obtained from the e-VDS35 database [2]. We randomly select the videos from six different object categories, which are chair, cup, lawn, computer, dog, and toys (two videos from toys). These specific categories were selected because they contained most color variations compared to other categories, i.e., ceiling, floor, or hand. The original videos of e-VDS35 have good lighting conditions, and therefore, we synthetically generate low-light videos by processing every frame using the Retinex-based approach as performed in [8], reducing the illumination map by 85%. The results are illustrated in a supplementary video named "*Video\_1\_Paper\_ID\_12.mp4*" demonstrating the enhanced video results along with plotting the PSNR values at each frame.

In the second experiment, we collect three videos of extreme low-light conditions in a real-world environment during night time. The first video was collected indoors with the only light source present in the room being from the laptop screen, while the remaining two videos were captured outdoors with very far light sources, i.e., moon and street lights. The videos are captured using a Canon EOS Rebel T6 camera, and saved as AVI format. Other than the extreme low light conditions in these videos, severe noise is also present. The results are illustrated in a supplementary video named "*Video\_2\_Paper\_ID\_12.mp4*" comparing the performance of CWAN with the three baselines, along with plotting the LOE values at each frame. From this video, we can observe that LIME usually over enhances low-light, producing high intensities at object surfaces reflecting light. LIME also tends to amplify the noise caused by extreme light conditions producing unpleasant scenes. LightenNet and SID produce very similar results in enhancing low-light videos, but both methods seem to produce poor colors in the enhanced image. On the other hand, with the aid of CWAN<sub>AB</sub>, our enhanced low-light image contains rich colors closer to the true object colors, and tends to suppress noise very well.

In summary, all three baselines including CWAN perform very well on enhancing low-light video, with a clear advantage by CWAN in synthesizing good color features and reducing the effect of noise. In Table 1, we report the average PSNR/LOE results. One important outcome of enhancing low-light videos, is the ability to enhance the lighting in a consistent manner throughout the video frames. We can observe from Table 1, that CWAN in most videos has the lowest standard deviation, demonstrating the stable performance compared to other methods.

| Database                                 | Videos         | LIME [6]           | LightenNet [8]     | SID [1]           | CWAN <sup>Sony</sup> |
|------------------------------------------|----------------|--------------------|--------------------|-------------------|----------------------|
| Synthetic video<br>e-VDS35 [2]<br>(PSNR) | Chair          | 19.87 $\pm$ 0.97   | 18.33 $\pm$ 1.20   | 21.11 $\pm$ 0.25  | 24.58 $\pm$ 0.57     |
|                                          | Cup            | 23.40 $\pm$ 1.13   | 21.56 $\pm$ 0.49   | 22.92 $\pm$ 0.38  | 25.10 $\pm$ 0.19     |
|                                          | Dog            | 18.02 $\pm$ 4.09   | 21.76 $\pm$ 1.33   | 21.20 $\pm$ 1.42  | 26.25 $\pm$ 1.06     |
|                                          | Lawn           | 21.76 $\pm$ 1.76   | 21.34 $\pm$ 0.95   | 21.18 $\pm$ 0.33  | 23.87 $\pm$ 0.27     |
|                                          | Computer       | 22.47 $\pm$ 2.02   | 14.33 $\pm$ 1.57   | 23.59 $\pm$ 1.07  | 27.62 $\pm$ 1.45     |
|                                          | Toy-1          | 18.36 $\pm$ 1.24   | 10.97 $\pm$ 1.00   | 21.80 $\pm$ 0.35  | 27.20 $\pm$ 0.30     |
|                                          | Toy-2          | 14.82 $\pm$ 0.32   | 19.53 $\pm$ 0.75   | 19.41 $\pm$ 0.17  | 23.10 $\pm$ 0.13     |
| Real low-light<br>videos<br>(LOE)        | Indoor toys    | 109.64 $\pm$ 2.34  | 91.06 $\pm$ 5.02   | 56.89 $\pm$ 1.19  | 50.59 $\pm$ 1.36     |
|                                          | Outdoor cactus | 127.63 $\pm$ 31.94 | 101.53 $\pm$ 32.53 | 96.50 $\pm$ 32.22 | 83.49 $\pm$ 28.25    |
|                                          | Outdoor garden | 108.88 $\pm$ 24.82 | 75.70 $\pm$ 18.03  | 77.43 $\pm$ 18.03 | 71.19 $\pm$ 14.67    |

Table 1. Average results on low-light video enhancement. All synthetic videos from e-VDS35 [2] are evaluated using the PSNR measure, while all collected real-world videos are evaluated using the LOE measure. Red/blue font means the best/second best results.

### 3. Lightness component enhancement $\hat{X}_L$ in $CWAN_L$

In Fig. 1, we illustrate the enhanced  $CWAN_L$  images of the ablation study "Analysis of  $CWAN_L$ ".

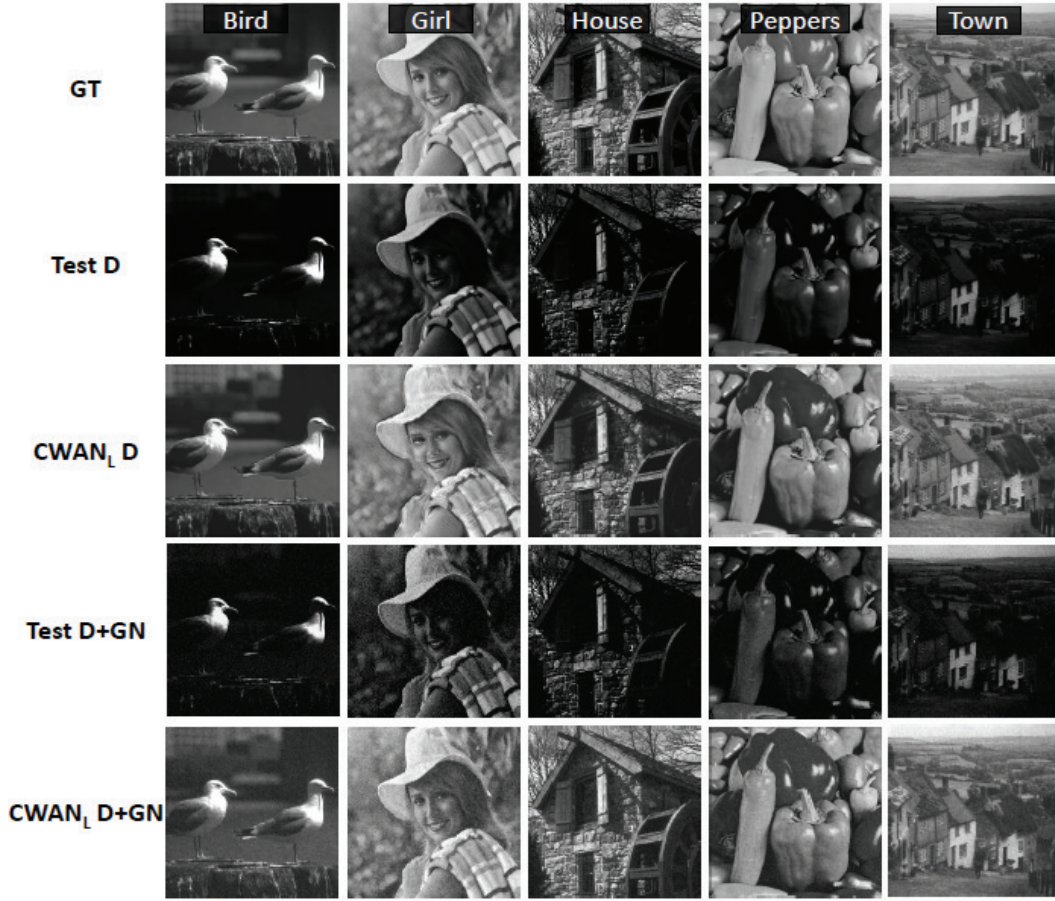

Figure 1. Visual analysis of  $CWAN_L$ . First row, the ground truth images of the five test set images used in [10]. Second row, the synthesized low-light images using the same protocol in [10]. Forth row, the synthesized low-light with Gaussian noise images using the same protocol in [10]. Third and fifth row, are the estimated enhanced lightness images from  $CWAN_L$  given the corresponding test image.

#### 4. Visual results of $SID_{Sony}$ , $SID_{Fuji}$ and PASCAL<sub>1000</sub>

We provide several examples on low-light enhancement illustrated in Fig. 2, 3, 4, 5, 6 and 7, which were obtained from  $SID_{Sony}$ ,  $SID_{Fuji}$  and PASCAL<sub>1000</sub>. The PSNR and SSIM values for every image in these examples are reported in Table 2.

| Method               | Fig. 2      | Fig. 3      | Fig. 4      | Fig. 5      | Fig. 6      | Fig. 7      |
|----------------------|-------------|-------------|-------------|-------------|-------------|-------------|
| HE                   | 20.21/0.511 | 21.27/0.765 | 23.03/0.844 | 13.89/0.577 | 26.49/0.823 | 28.55/0.828 |
| Dong [3]             | 22.39/0.770 | 20.15/0.837 | 20.31/0.909 | 26.66/0.931 | 18.62/0.917 | 23.51/0.807 |
| BIMEF [13]           | 21.68/0.803 | 11.17/0.704 | 14.37/0.683 | 15.46/0.671 | 11.06/0.687 | 21.34/0.821 |
| Ying [14]            | 22.23/0.800 | 15.67/0.783 | 19.09/0.785 | 21.01/0.790 | 16.17/0.805 | 20.72/0.770 |
| JED [11]             | 20.24/0.716 | 10.68/0.723 | 13.81/0.766 | 15.41/0.801 | 10.91/0.667 | 19.97/0.731 |
| AMSR [7]             | 17.18/0.632 | 11.88/0.716 | 15.21/0.818 | 18.91/0.890 | 11.24/0.745 | 17.43/0.634 |
| LIME [6]             | 19.70/0.745 | 16.90/0.863 | 22.00/0.932 | 22.56/0.920 | 15.98/0.935 | 18.59/0.694 |
| Li [9]               | 20.38/0.717 | 10.67/0.717 | 13.83/0.775 | 15.41/0.799 | 10.90/0.670 | 19.85/0.715 |
| LECARM [12]          | 22.23/0.851 | 13.89/0.821 | 16.67/0.829 | 17.53/0.820 | 14.38/0.855 | 23.78/0.944 |
| MBLLEN [5]           | 13.29/0.668 | 13.06/0.746 | 15.46/0.744 | 15.90/0.780 | 21.22/0.814 | 13.45/0.553 |
| LightenNet [8]       | 25.70/0.858 | 17.69/0.818 | 15.21/0.852 | 21.34/0.922 | 14.25/0.845 | 21.84/0.895 |
| SID [1]              | 26.63/0.848 | 26.36/0.868 | 25.81/0.905 | 26.71/0.939 | 26.22/0.858 | 29.19/0.900 |
| CWAN <sup>Sony</sup> | 28.72/0.896 | 29.25/0.913 | 27.34/0.947 | 27.53/0.947 | 31.85/0.957 | 32.60/0.915 |
| CWAN <sup>Fuji</sup> | 28.09/0.892 | 28.70/0.921 | 25.93/0.950 | 25.64/0.946 | 30.69/0.958 | 30.19/0.871 |

Table 2. PSNR and SSIM for the examples in the listed figures.



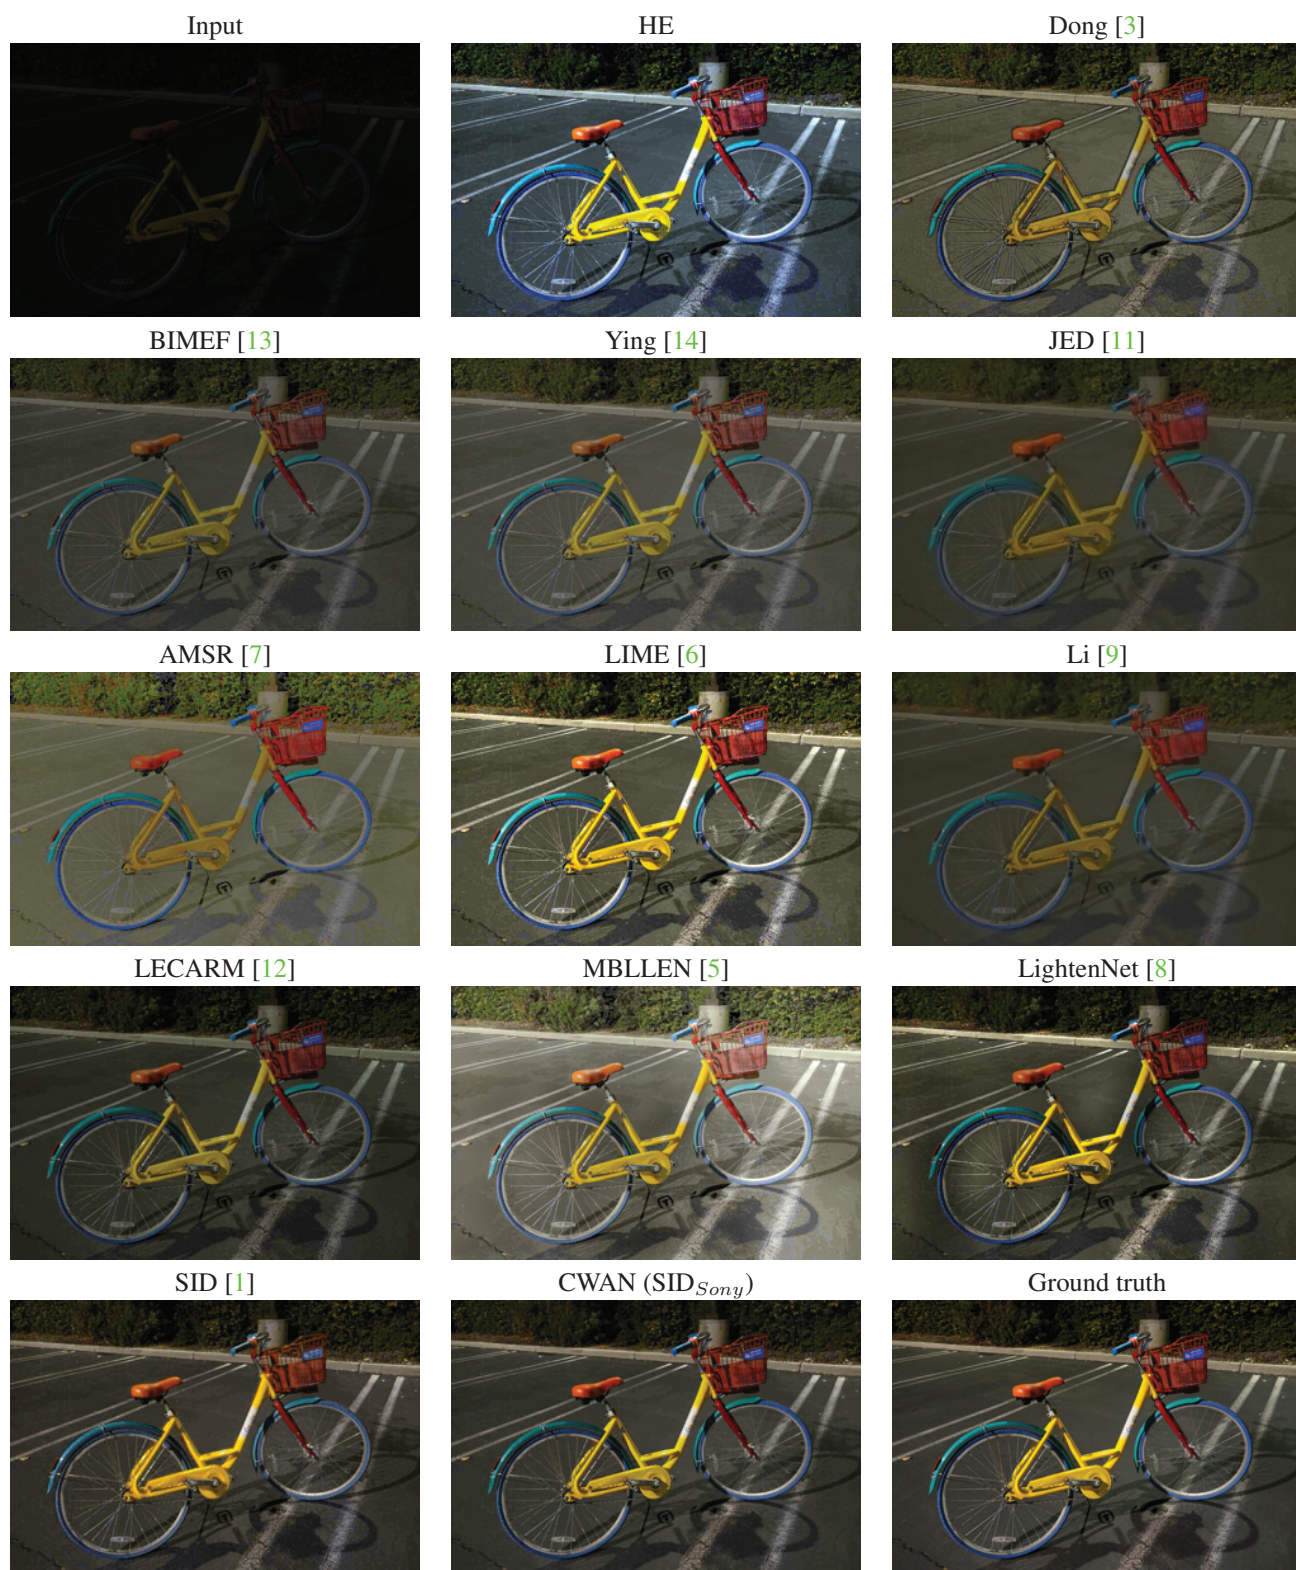

Figure 2. Example from SID<sub>Sony</sub>.



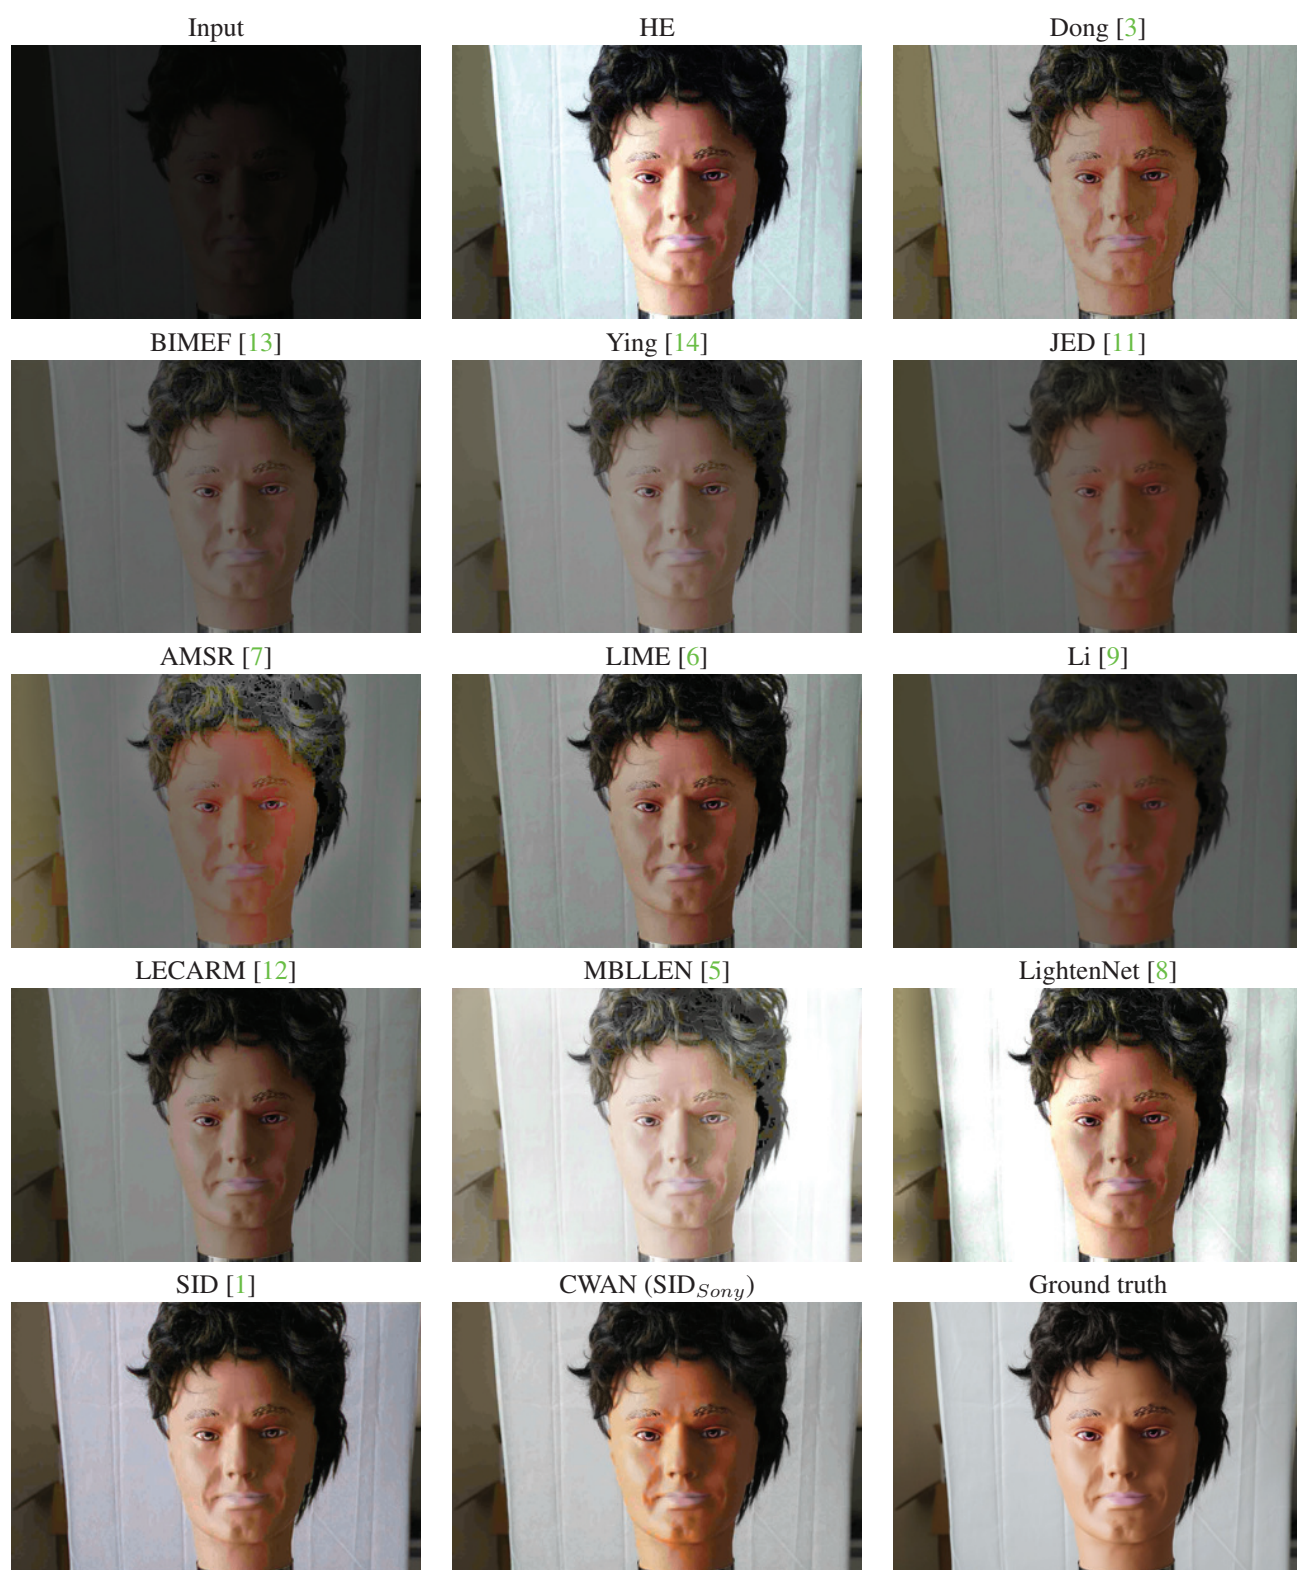

Figure 3. Example from SID<sub>Sony</sub>.

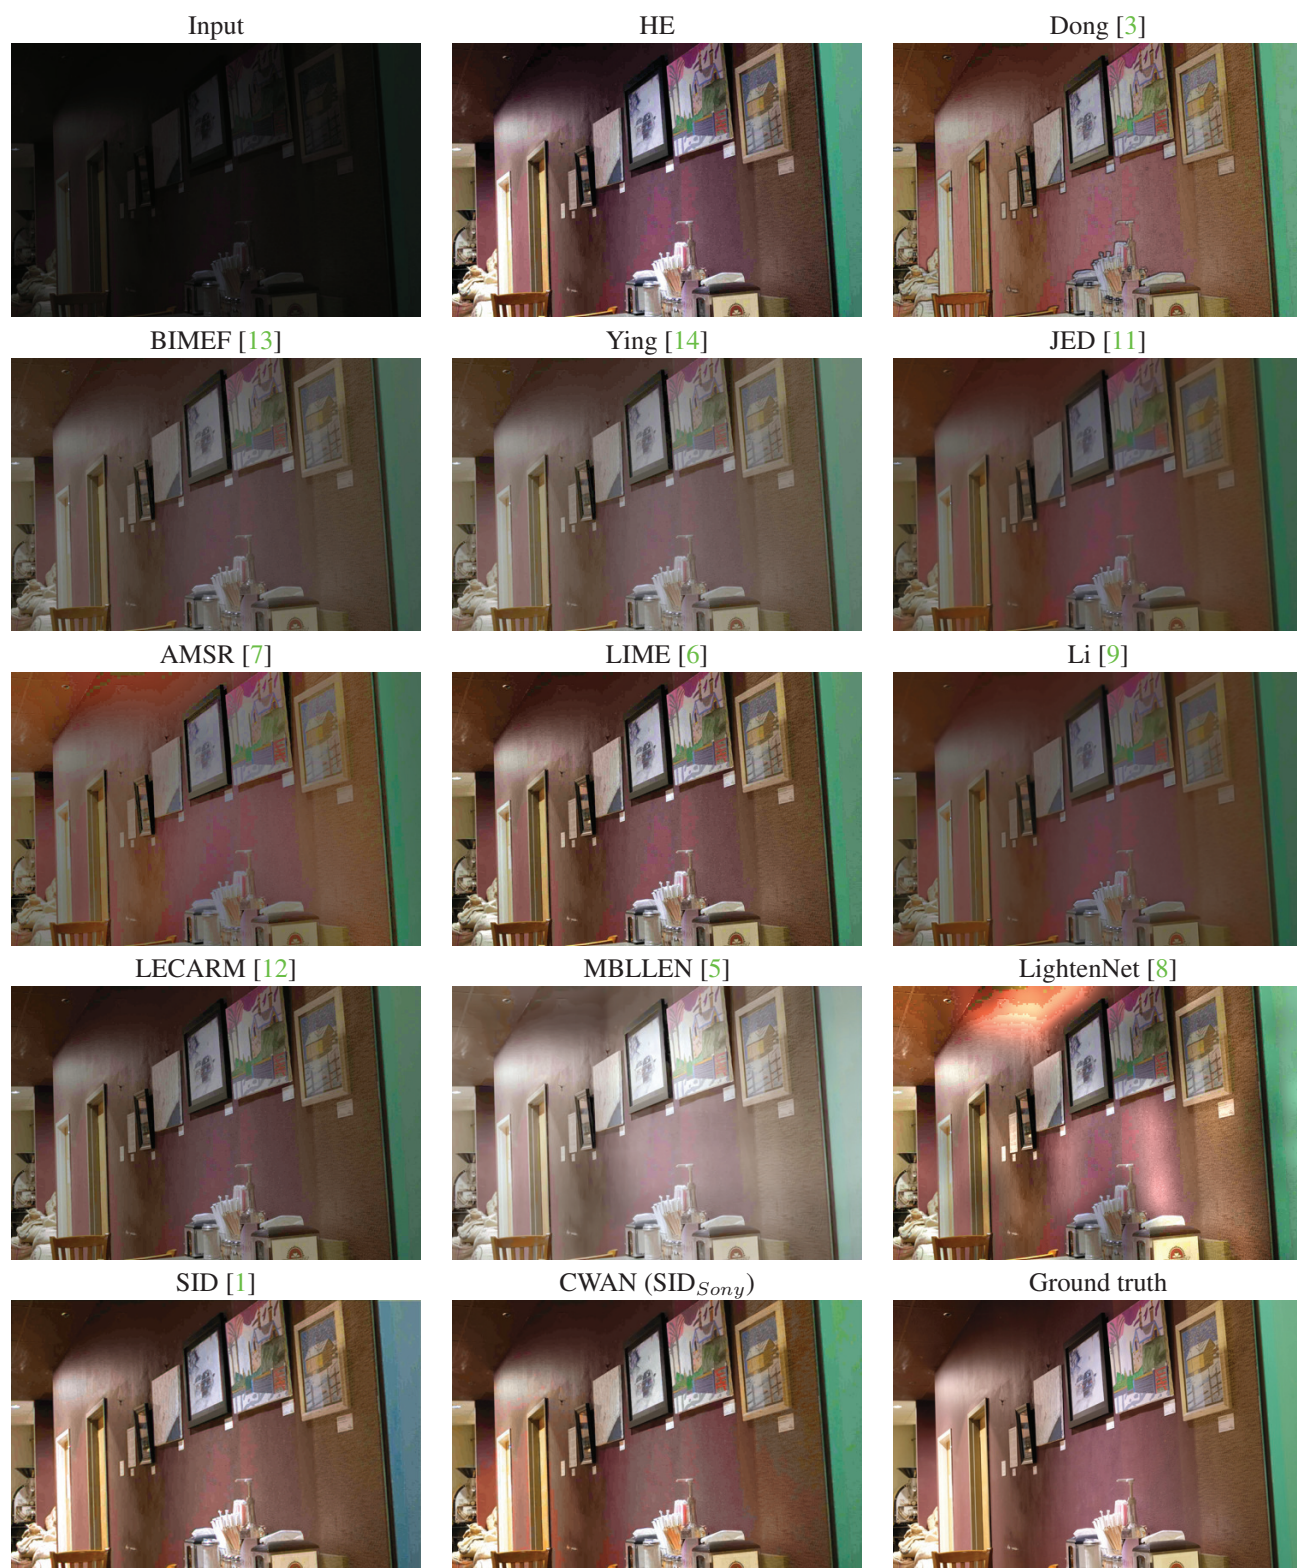

Figure 4. Example from SID<sub>Fuji</sub>.



Input

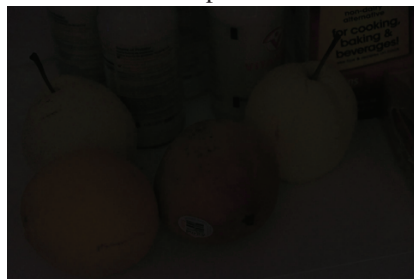

HE

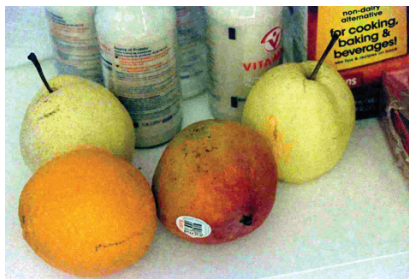

Dong [3]

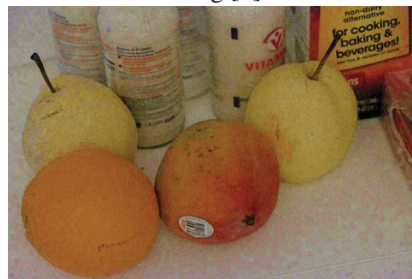

BIMEF [13]

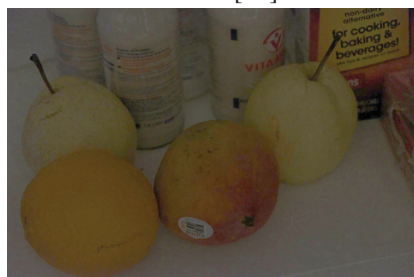

Ying [14]

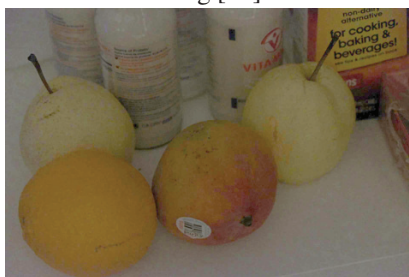

JED [11]

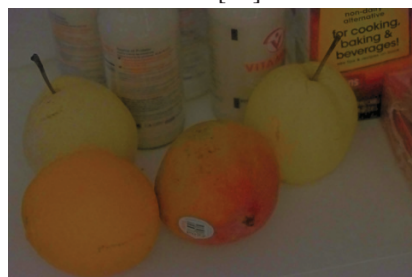

AMSR [7]

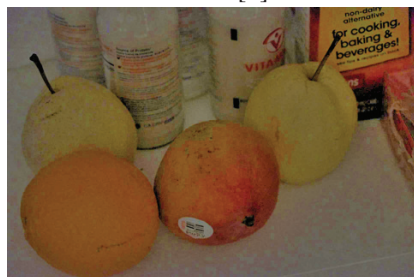

LIME [6]

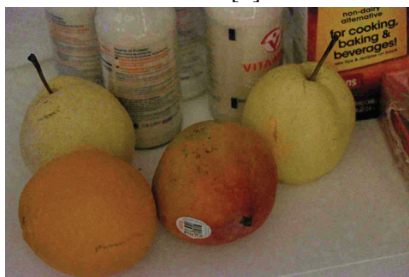

Li [9]

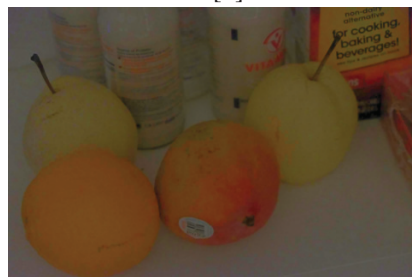

LECARM [12]

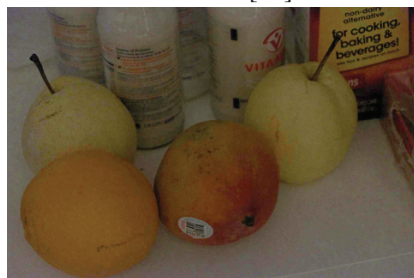

MBLLEN [5]

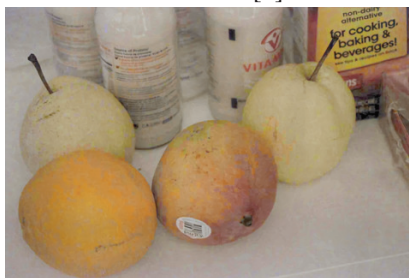

LightenNet [8]

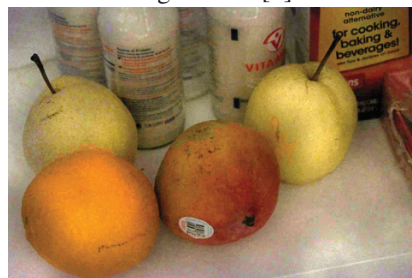

SID [1]

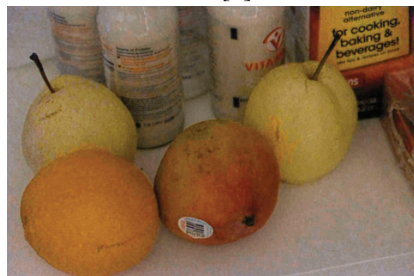

CWAN (SID<sub>Sony</sub>)

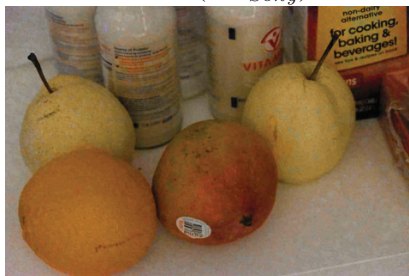

Ground truth

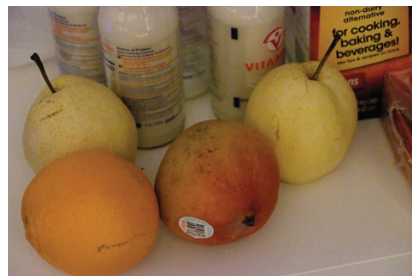

Figure 5. Example from SID<sub>Fuji</sub>.

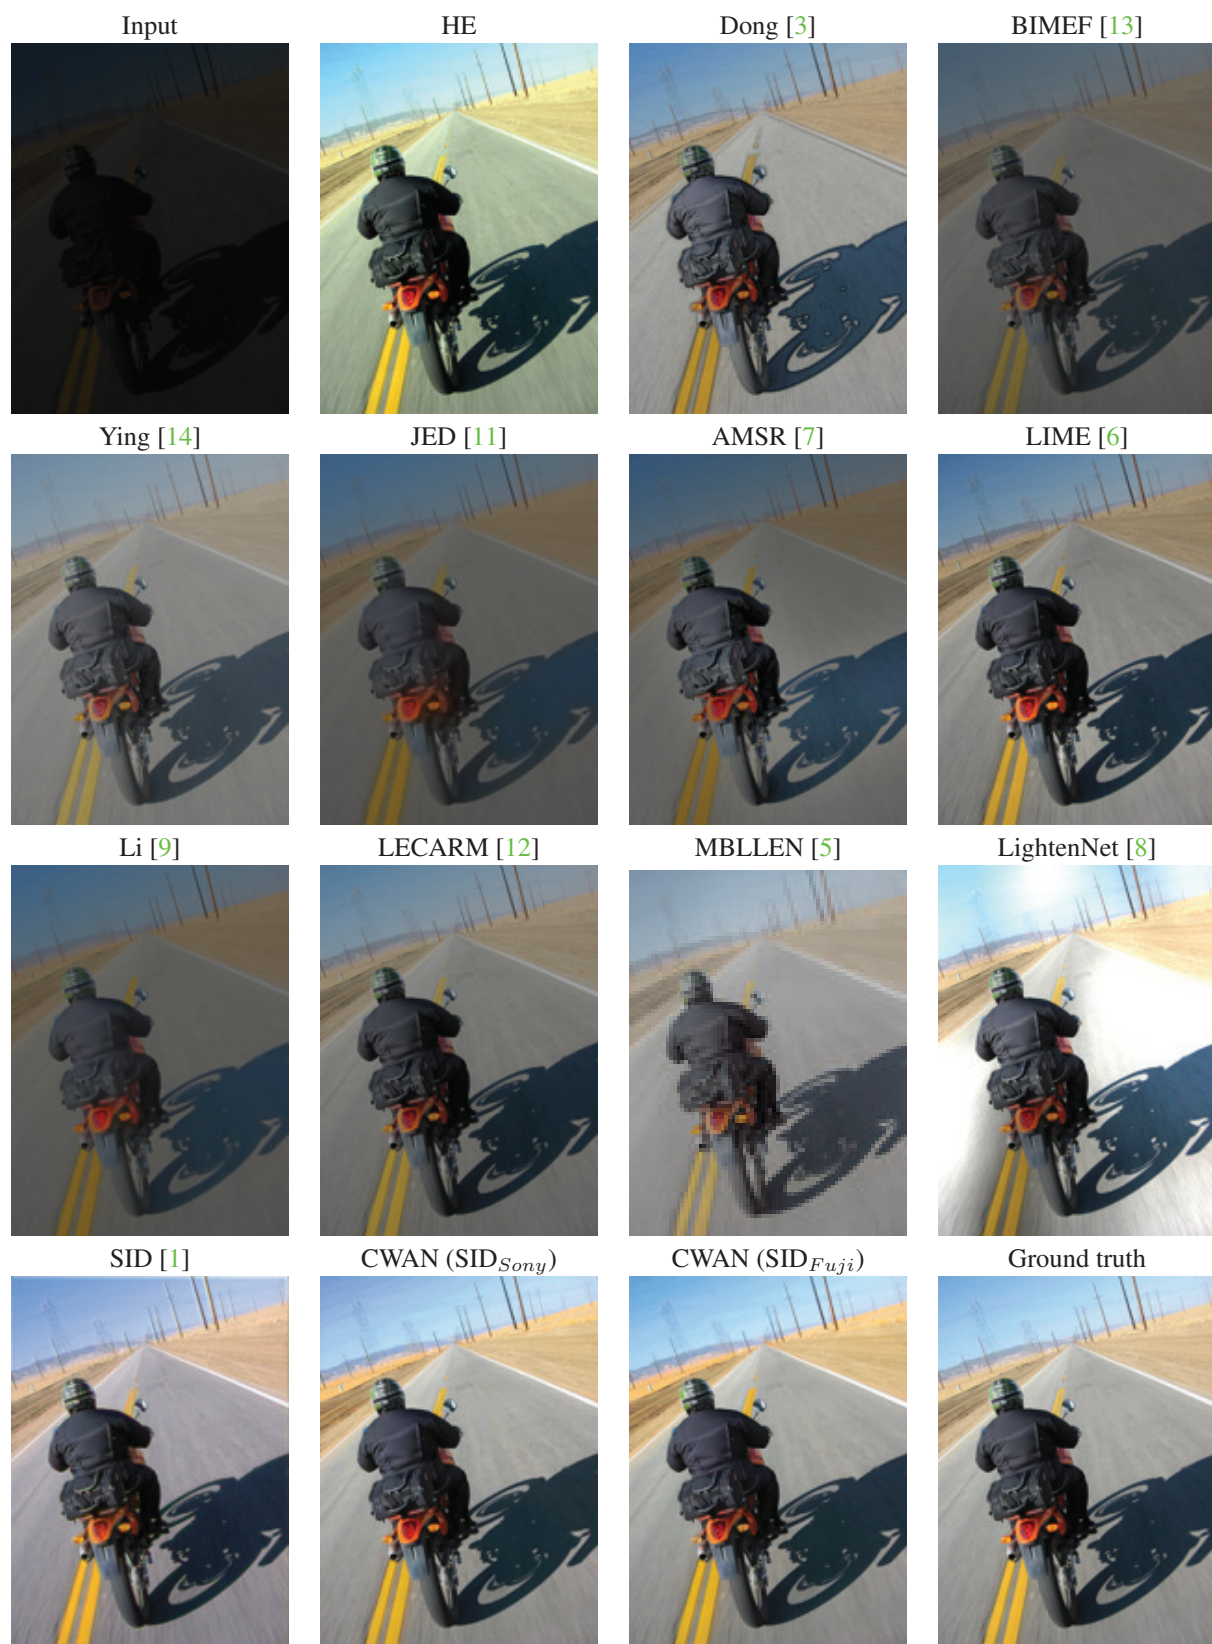

Figure 6. Example from PASCAL<sub>1000</sub>.



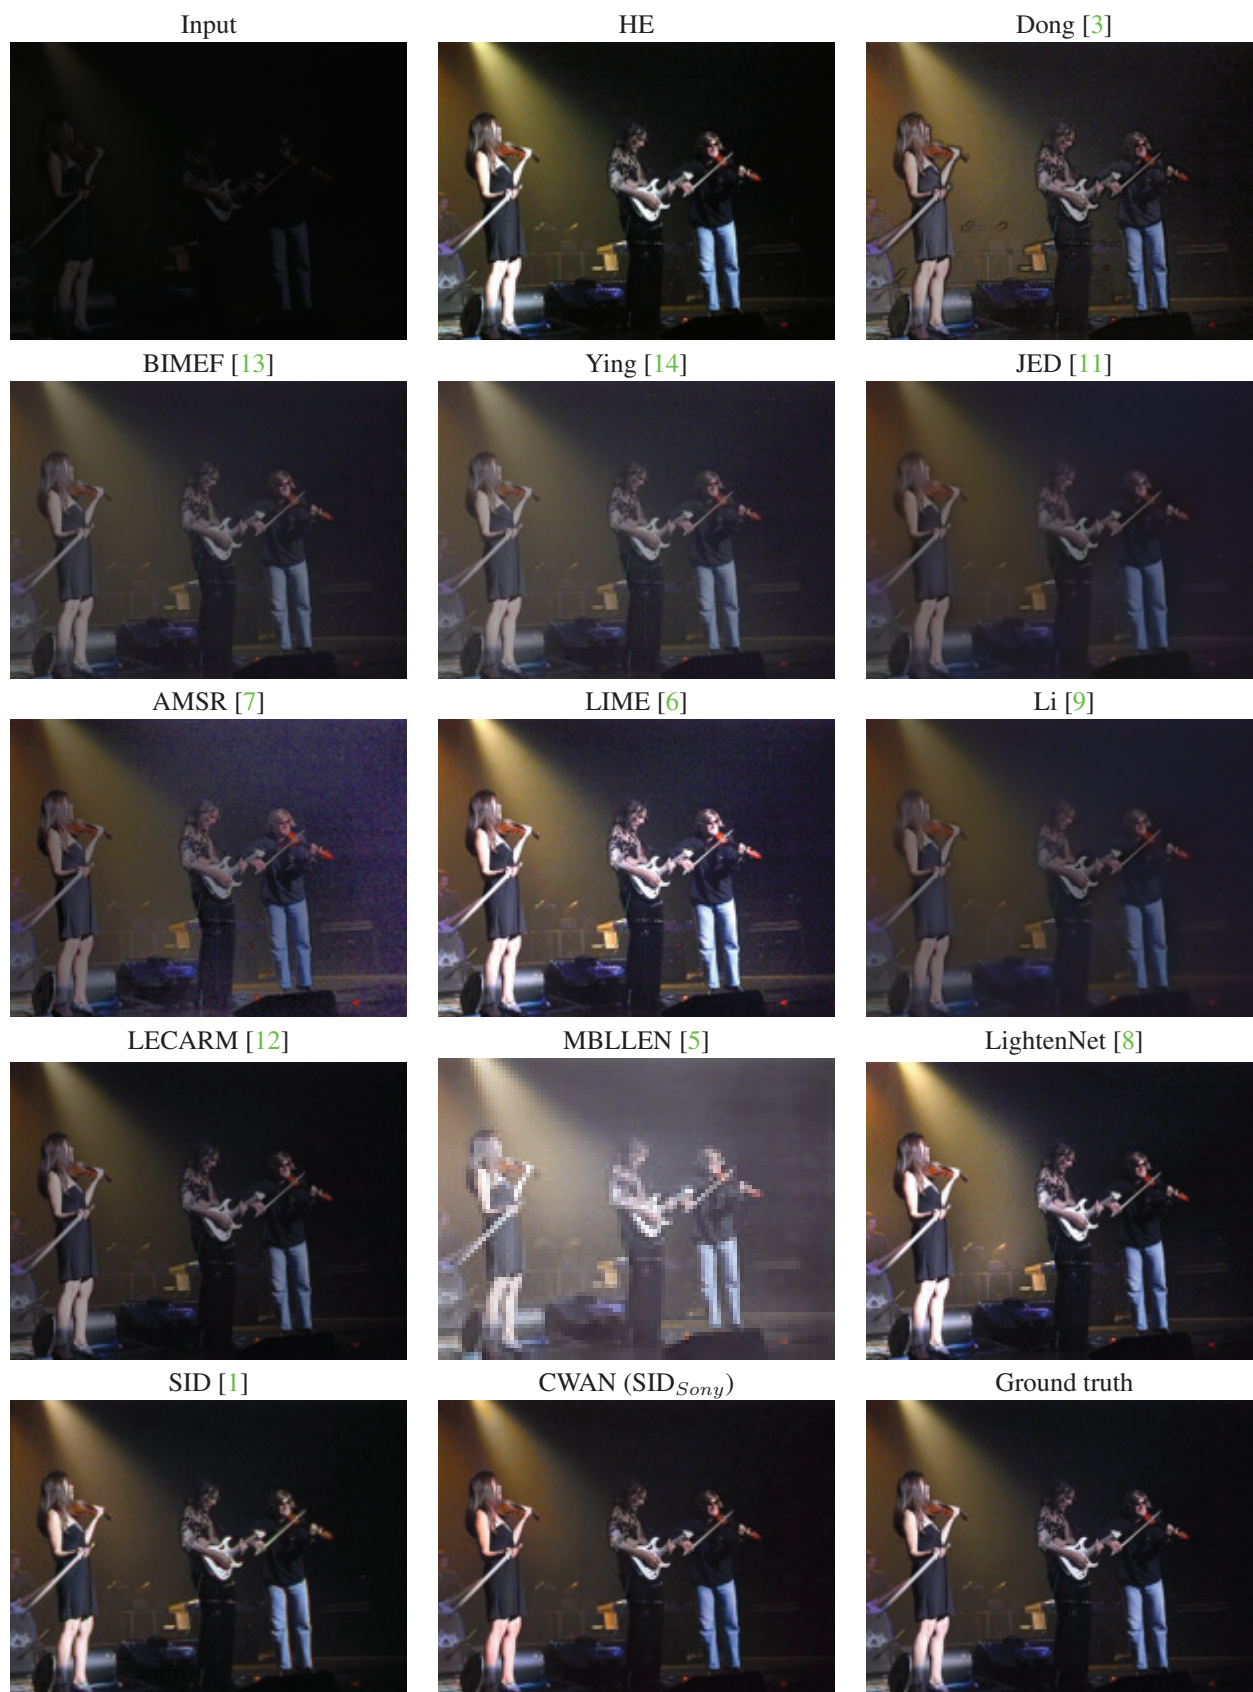

Figure 7. Example from PASCAL<sub>1000</sub>.



## 5. Visual results of HDRDB

Our qualitative and case study experiment in the main paper was carried out using HDRDB [4]. We provide more examples using this set on low-light enhancement illustrated in Fig. 8 and Fig. 9.

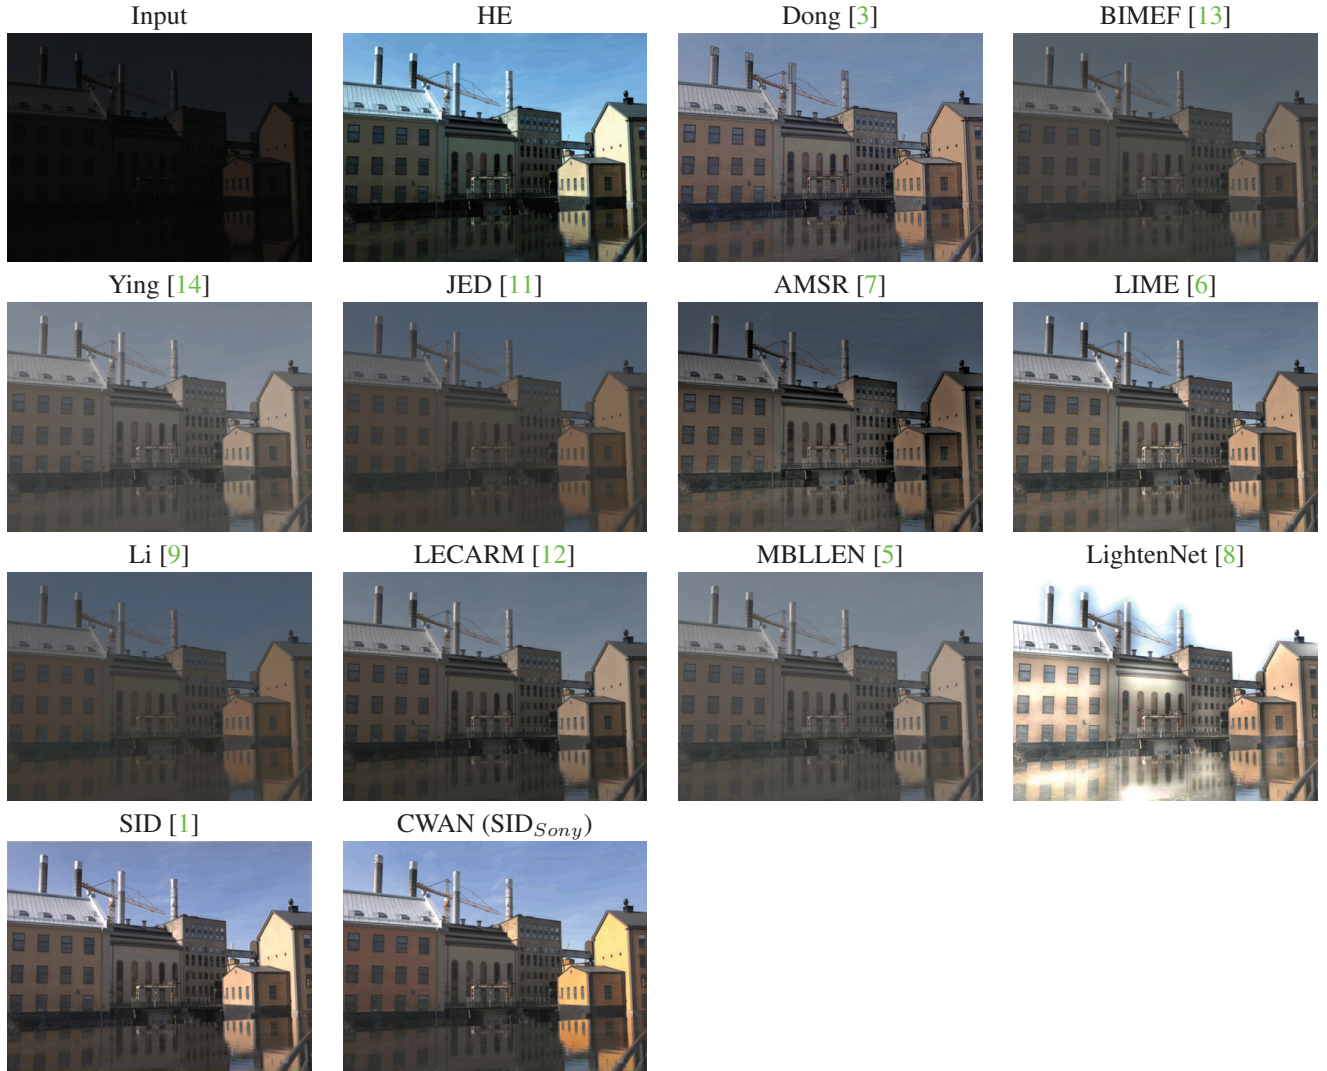

Figure 8. Example from HDRDB.

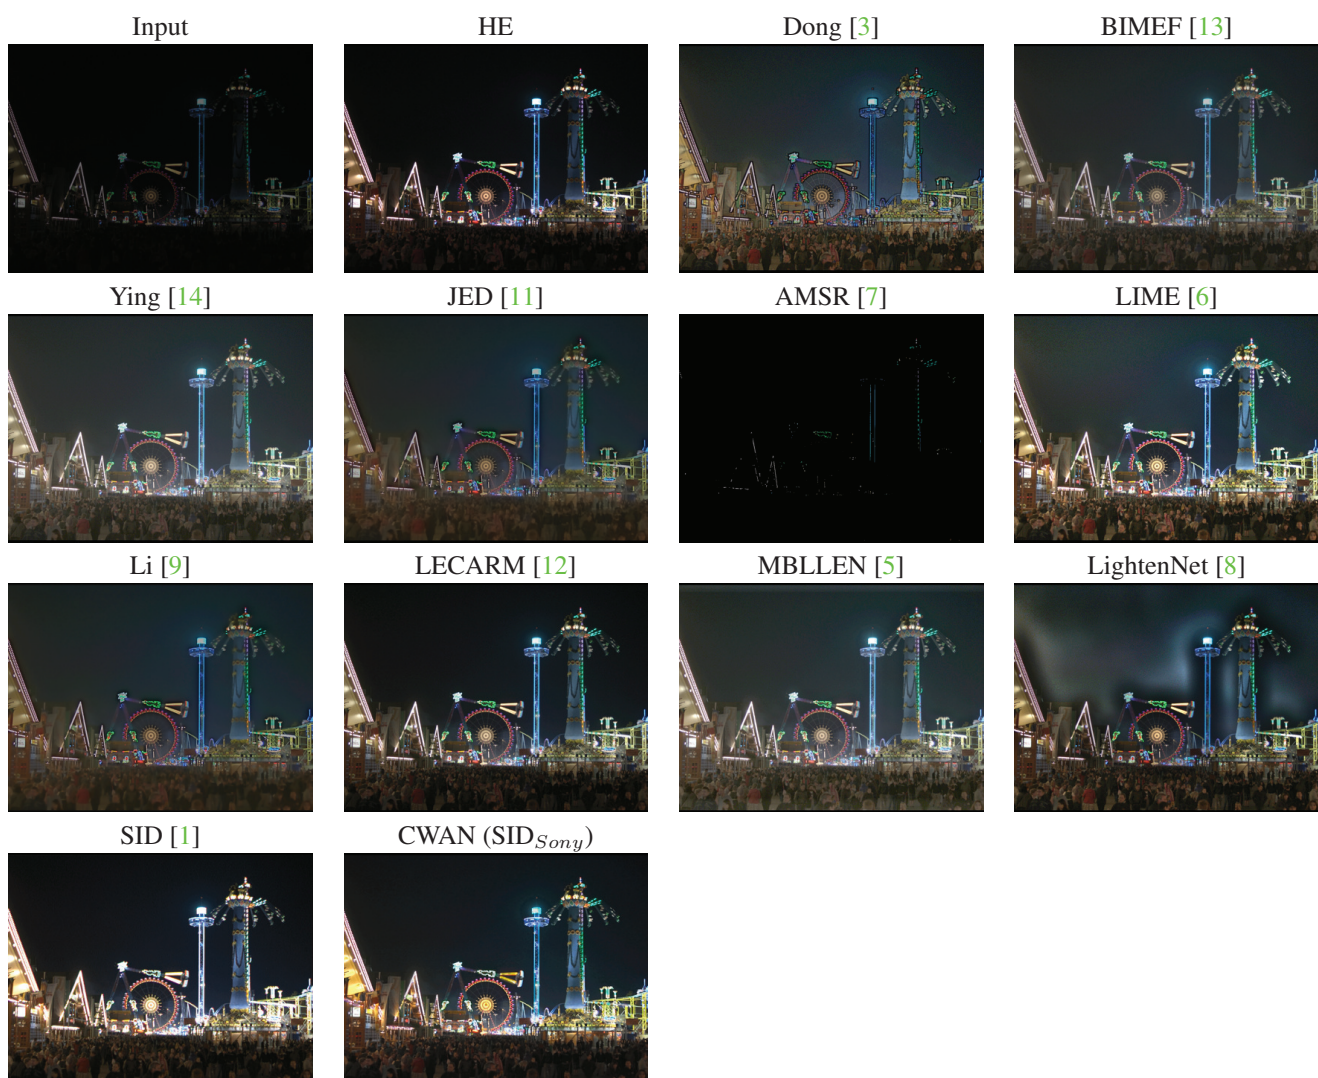

Figure 9. Example from HDRDB.



## 6. Generating colorful images

CWAN<sub>AB</sub> is supervised by key color cues generated by the attention maps  $\hat{\mathbf{M}}$ , to synthesize vibrant and colorful enhanced low-light images. We observe in many test cases, the enhanced image seems to have better colors than the ground truth image as in Fig. 10. Note that CWAN<sub>AB</sub> is learned to map from low-light images to enhanced colorful images using the SID database. Therefore, it will attempt to convert any low-light image into its best colorful version, which in turn might be better than the ground truth. The colorfulness metrics are also correlated with our observation. For example, the ground truth images of PASCAL<sub>1000</sub> have  $C = 32.51$ , where our estimated images have  $C = 37.21$ .

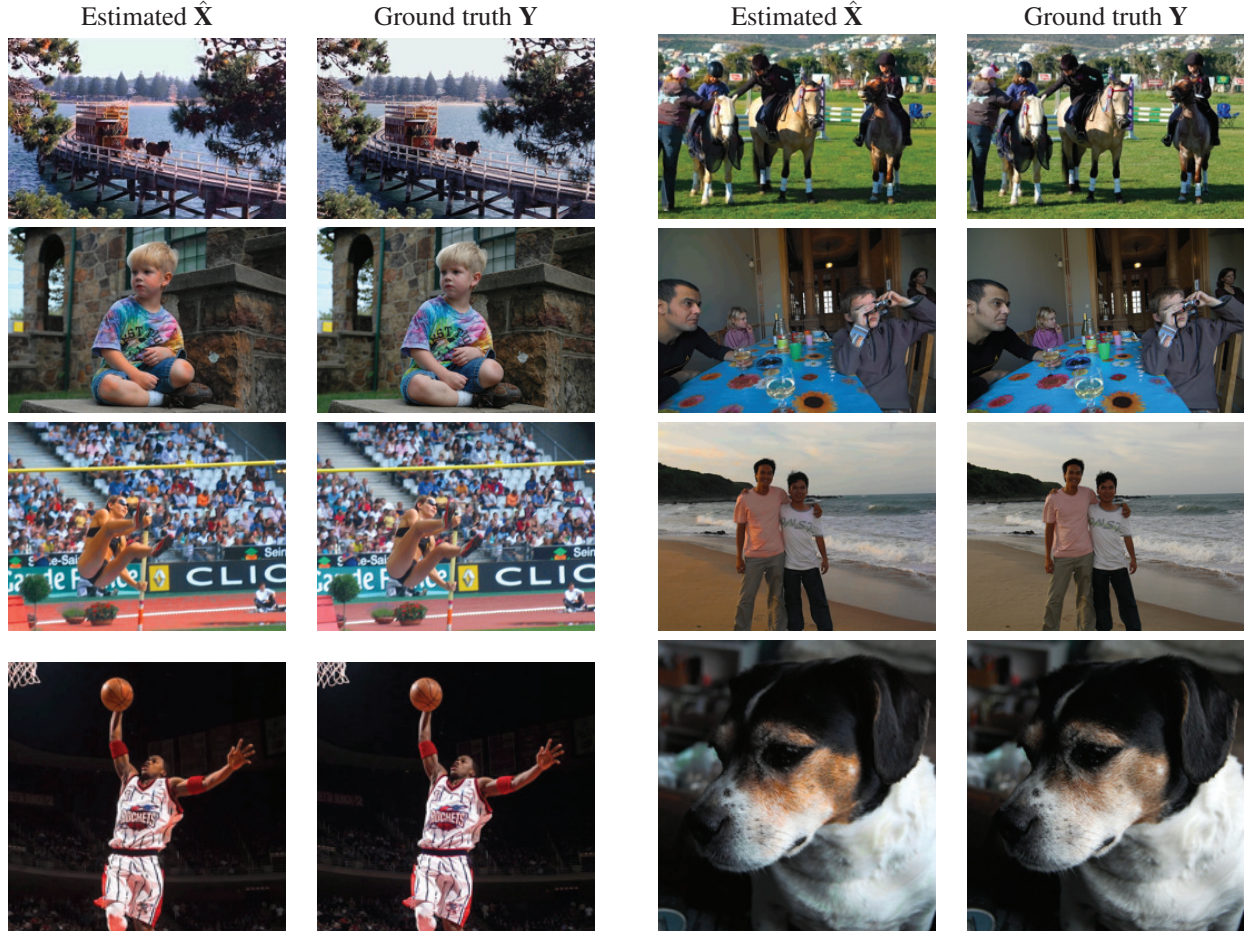

Figure 10.  $\hat{\mathbf{X}}$  vs.  $\mathbf{Y}$ . Comparing estimated image from CWAN  $\hat{\mathbf{X}}$  (Left), with the ground truth image  $\mathbf{Y}$  (Right).

Given that CWAN can generate more colorful, vibrant and lively images than the original image, this feature can be used to enhance pale, dull and faded colors as seen from the examples in Fig. 11. Note that CWAN is not a colorization model, and therefore it cannot colorize gray scale images. CWAN still requires degraded colors to be present in the scene in order to enhance the image. For example, the face in the third row in Fig. 11, barely contains any skin color-tone in the original image, allowing limited improvement by CWAN in enhancing the colors.

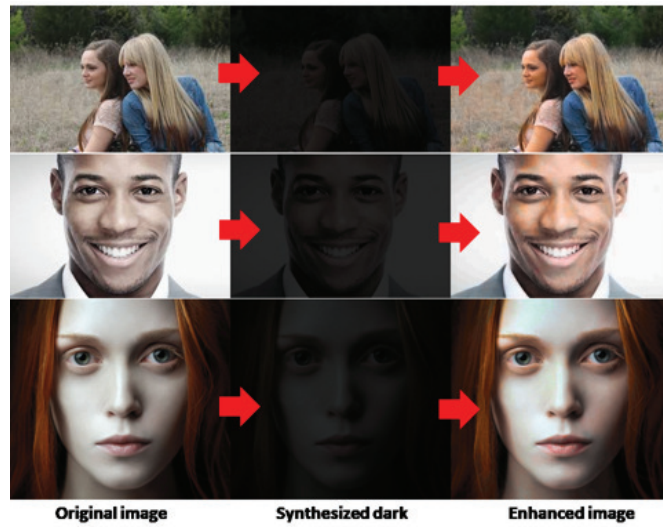

Figure 11. Enhancing pale color-tone faces randomly selected from the internet. First column is the original face. The second column is synthesized to low-light image using the method in [8]. The third column is the enhanced image, representing more colorful skin tones.

## References

- [1] C. Chen, Q. Chen, J. Xu, and V. Koltun. Learning to see in the dark. In *Proceedings of the IEEE Conference on Computer Vision and Pattern Recognition*, 2018. 2, 4, 5, 6, 7, 8, 9, 10, 11, 12
- [2] E. Culurciello and A. Canziani. e-Lab video data set. <https://engineering.purdue.edu/elab/eVDS/>, 2017. 2
- [3] X. Dong, G. Wang, Y. Pang, W. Li, J. Wen, W. Meng, and Y. Lu. Fast efficient algorithm for enhancement of low lighting video. In *2011 IEEE International Conference on Multimedia and Expo*, pages 1–6, July 2011. 4, 5, 6, 7, 8, 9, 10, 11, 12
- [4] G. Eilertsen, J. Kronander, G. Denes, R. Mantiuk, and J. Unger. HDR image reconstruction from a single exposure using deep CNNs. *ACM Transactions on Graphics*, 36(6), 2017. 11
- [5] J. W. Feifan Lv, Feng Lu and C. Lim. MBLLEN: Low-light image/video enhancement using CNNs. *British Machine Vision Conference*, 2018. 4, 5, 6, 7, 8, 9, 10, 11, 12
- [6] X. Guo, Y. Li, and H. Ling. LIME: Low-light image enhancement via illumination map estimation. *IEEE Transactions on Image Processing*, 26(2):982–993, 2017. 2, 4, 5, 6, 7, 8, 9, 10, 11, 12
- [7] C.-H. Lee, J.-L. Shih, C.-C. Lien, and C.-C. Han. Adaptive multiscale retinex for image contrast enhancement. In *International Conference on Signal-Image Technology & Internet-Based Systems*, pages 43–50. IEEE, 2013. 4, 5, 6, 7, 8, 9, 10, 11, 12
- [8] C. Li, J. Guo, F. Porikli, and Y. Pang. LightenNet: A convolutional neural network for weakly illuminated image enhancement. *Pattern Recognition Letters*, 104:15–22, 2018. 2, 4, 5, 6, 7, 8, 9, 10, 11, 12, 14
- [9] M. Li, J. Liu, W. Yang, X. Sun, and Z. Guo. Structure-revealing low-light image enhancement via robust retinex model. *IEEE Transactions on Image Processing*, 27(6):2828–2841, 2018. 4, 5, 6, 7, 8, 9, 10, 11, 12
- [10] K. G. Lore, A. Akintayo, and S. Sarkar. LLNet: A deep autoencoder approach to natural low-light image enhancement. *Pattern Recognition*, 61:650–662, 2017. 1, 3
- [11] X. Ren, M. Li, W.-H. Cheng, and J. Liu. Joint enhancement and denoising method via sequential decomposition. In *IEEE International Symposium on Circuits and Systems*, pages 1–5. IEEE, 2018. 4, 5, 6, 7, 8, 9, 10, 11, 12
- [12] Y. Ren, Z. Ying, T. H. Li, and G. Li. Lecarm: Low-light image enhancement using the camera response model. *IEEE Transactions on Circuits and Systems for Video Technology*, 29(4):968–981, 2018. 4, 5, 6, 7, 8, 9, 10, 11, 12
- [13] Z. Ying, G. Li, and W. Gao. A bio-inspired multi-exposure fusion framework for low-light image enhancement. *arXiv preprint arXiv:1711.00591*, 2017. 4, 5, 6, 7, 8, 9, 10, 11, 12
- [14] Z. Ying, G. Li, Y. Ren, R. Wang, and W. Wang. A new low-light image enhancement algorithm using camera response model. In *IEEE International Conference on Computer Vision Workshops*, pages 3015–3022, Oct 2017. 4, 5, 6, 7, 8, 9, 10, 11, 12
